# Supplementary material for: Occurrence of Disinfection By-Products in Swimming Pools in the Area of Thessaloniki, Northern Greece. Assessment of Multi-Pathway Exposure and Risk
Source: MDPI journal article supplement (doi:10.3390/molecules26247639), 2021-12-16
Supplement: s1 [file s1]

## SUPPLEMENTARY MATERIAL

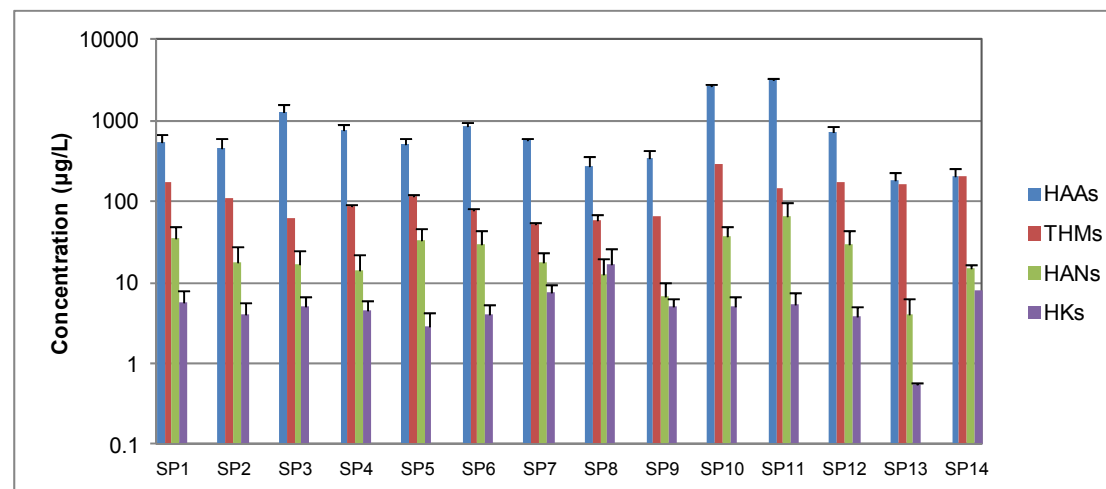

**Figure S1.** Concentrations of DBPs (mean±sd) in swimming pools.

**Table S1.** Spearman's correlation coefficients (values in bold are significant at 0.01level, values in italics are significant at 0.05 level)

|                  | HAA <sub>s</sub> | DCAA         | TCAA         | BCAA         | DBAA          | BDCAA        | DCBAA         | THM <sub>s</sub> | TCM           | BDCM          | DBCM          | TBM          | HAN <sub>s</sub> | TCAN          | DCAN          | BCAN         | DBAN         | TCNM         | TCP           | Cl <sub>2</sub> | DOC          | UV           | SUVA   | pH           | Alk   | TN |
|------------------|------------------|--------------|--------------|--------------|---------------|--------------|---------------|------------------|---------------|---------------|---------------|--------------|------------------|---------------|---------------|--------------|--------------|--------------|---------------|-----------------|--------------|--------------|--------|--------------|-------|----|
| HAA <sub>s</sub> | 1                |              |              |              |               |              |               |                  |               |               |               |              |                  |               |               |              |              |              |               |                 |              |              |        |              |       |    |
| DCAA             | <b>0.887</b>     | 1            |              |              |               |              |               |                  |               |               |               |              |                  |               |               |              |              |              |               |                 |              |              |        |              |       |    |
| TCAA             | <b>0.992</b>     | <b>0.845</b> | 1            |              |               |              |               |                  |               |               |               |              |                  |               |               |              |              |              |               |                 |              |              |        |              |       |    |
| BCAA             | <b>0.412</b>     | <b>0.451</b> | <b>0.385</b> | 1            |               |              |               |                  |               |               |               |              |                  |               |               |              |              |              |               |                 |              |              |        |              |       |    |
| DBAA             | <b>0.551</b>     | <b>0.558</b> | <b>0.531</b> | <b>0.626</b> | 1             |              |               |                  |               |               |               |              |                  |               |               |              |              |              |               |                 |              |              |        |              |       |    |
| BDCAA            | <b>0.922</b>     | <b>0.835</b> | <b>0.92</b>  | <b>0.437</b> | <b>0.575</b>  | 1            |               |                  |               |               |               |              |                  |               |               |              |              |              |               |                 |              |              |        |              |       |    |
| DCBAA            | <b>0.539</b>     | <b>0.534</b> | <b>0.521</b> | <b>0.491</b> | <b>0.818</b>  | <b>0.539</b> | 1             |                  |               |               |               |              |                  |               |               |              |              |              |               |                 |              |              |        |              |       |    |
| THM <sub>s</sub> | -0.158           | -0.114       | -0.187       | <i>0.325</i> | <i>0.324</i>  | -0.105       | <b>0.392</b>  | 1                |               |               |               |              |                  |               |               |              |              |              |               |                 |              |              |        |              |       |    |
| TCM              | -0.170           | -0.127       | -0.199       | <i>0.334</i> | <i>0.310</i>  | -0.115       | <b>0.357</b>  | <b>0.993</b>     | 1             |               |               |              |                  |               |               |              |              |              |               |                 |              |              |        |              |       |    |
| BDCM             | <b>0.774</b>     | <b>0.813</b> | <b>0.748</b> | <b>0.411</b> | <b>0.590</b>  | <b>0.749</b> | <b>0.558</b>  | 0.003            | -0.033        | 1             |               |              |                  |               |               |              |              |              |               |                 |              |              |        |              |       |    |
| DBCM             | 0.194            | 0.232        | 0.156        | <i>0.311</i> | <b>0.516</b>  | 0.205        | <b>0.473</b>  | <b>0.444</b>     | <b>0.435</b>  | <b>0.401</b>  | 1             |              |                  |               |               |              |              |              |               |                 |              |              |        |              |       |    |
| TBM              | -0.222           | -0.217       | -0.216       | 0.118        | 0.124         | -0.240       | 0.255         | <b>0.375</b>     | <i>0.309</i>  | -0.092        | -0.047        | 1            |                  |               |               |              |              |              |               |                 |              |              |        |              |       |    |
| HAN <sub>s</sub> | 0.103            | 0.130        | 0.068        | <b>0.407</b> | 0.245         | 0.217        | 0.178         | <b>0.517</b>     | <b>0.524</b>  | 0.214         | <b>0.401</b>  | 0.019        | 1                |               |               |              |              |              |               |                 |              |              |        |              |       |    |
| TCAN             | -0.056           | -0.018       | -0.064       | 0.124        | <i>0.265</i>  | -0.144       | <b>0.346</b>  | <b>0.382</b>     | <i>0.331</i>  | 0.097         | 0.107         | <b>0.711</b> | 0.082            | 1             |               |              |              |              |               |                 |              |              |        |              |       |    |
| DCAN             | 0.180            | 0.207        | 0.149        | <b>0.389</b> | 0.195         | <i>0.282</i> | 0.157         | <b>0.447</b>     | <b>0.466</b>  | <i>0.264</i>  | <b>0.437</b>  | -0.136       | <b>0.880</b>     | -0.158        | 1             |              |              |              |               |                 |              |              |        |              |       |    |
| BCAN             | <b>0.453</b>     | <b>0.528</b> | <b>0.422</b> | <b>0.402</b> | <b>0.430</b>  | <b>0.541</b> | <b>0.340</b>  | 0.156            | 0.149         | <b>0.594</b>  | <b>0.517</b>  | -0.198       | <b>0.618</b>     | -0.125        | <b>0.629</b>  | 1            |              |              |               |                 |              |              |        |              |       |    |
| DBAN             | <b>0.475</b>     | <b>0.503</b> | <b>0.446</b> | 0.226        | <b>0.524</b>  | <b>0.405</b> | <b>0.471</b>  | -0.022           | -0.047        | <b>0.656</b>  | <b>0.489</b>  | -0.028       | 0.108            | 0.188         | 0.103         | <b>0.484</b> | 1            |              |               |                 |              |              |        |              |       |    |
| TCNM             | <b>0.410</b>     | <b>0.409</b> | <b>0.414</b> | 0.246        | <b>0.409</b>  | <i>0.332</i> | <b>0.502</b>  | 0.153            | 0.122         | 0.602         | 0.243         | 0.084        | 0.006            | 0.199         | 0.106         | 0.221        | <b>0.390</b> | 1            |               |                 |              |              |        |              |       |    |
| TCP              | 0.075            | 0.018        | 0.073        | 0.243        | -0.047        | 0.197        | -0.042        | 0.112            | 0.159         | <b>0.072</b>  | 0.076         | -0.27        | <b>0.526</b>     | <i>-0.324</i> | <b>0.608</b>  | <i>0.331</i> | -0.090       | -0.112       | 1             |                 |              |              |        |              |       |    |
| Cl <sub>2</sub>  | -0.042           | -0.288       | 0.012        | -0.281       | <b>-0.484</b> | -0.216       | <b>-0.484</b> | -0.185           | -0.153        | <i>-0.338</i> | <i>-0.354</i> | -0.376       | 0.022            | -0.077        | 0.031         | -0.270       | -0.226       | -0.177       | 0.247         | 1               |              |              |        |              |       |    |
| DOC              | 0.234            | 0.202        | 0.210        | 0.183        | <i>0.312</i>  | 0.159        | <i>0.278</i>  | 0.117            | 0.109         | 0.230         | 0.092         | 0.152        | -0.031           | 0.254         | -0.175        | -0.085       | <i>0.298</i> | 0.068        | -0.113        | 0.086           | 1            |              |        |              |       |    |
| UV               | <b>0.473</b>     | <b>0.755</b> | <i>0.368</i> | <b>0.479</b> | <b>0.709</b>  | <b>0.526</b> | <b>0.683</b>  | <b>0.703</b>     | <b>0.663</b>  | <b>0.590</b>  | <b>0.547</b>  | <b>0.434</b> | <b>0.493</b>     | <b>0.591</b>  | <b>0.476</b>  | <b>0.467</b> | <i>0.418</i> | <b>0.431</b> | -0.177        | <b>-0.472</b>   | 0.275        | 1            |        |              |       |    |
| SUVA             | 0.305            | <b>0.499</b> | 0.260        | 0.278        | <i>0.403</i>  | <i>0.355</i> | <b>0.424</b>  | <b>0.511</b>     | <b>0.462</b>  | <i>0.381</i>  | 0.267         | <b>0.447</b> | 0.322            | <b>0.476</b>  | <i>0.351</i>  | 0.302        | 0.078        | <i>0.349</i> | -0.225        | <i>-0.404</i>   | -0.193       | <b>0.823</b> | 1      |              |       |    |
| pH               | 0.111            | 0.067        | 0.094        | -0.157       | 0.069         | 0.018        | 0.061         | -0.020           | -0.038        | 0.177         | 0.148         | -0.132       | -0.169           | -0.113        | -0.081        | -0.067       | 0.178        | <b>0.406</b> | -0.267        | 0.055           | 0.255        | -0.037       | -0.201 | 1            |       |    |
| Alk              | 0.147            | 0.217        | 0.109        | 0.012        | 0.186         | 0.056        | 0.156         | 0.201            | 0.155         | <i>0.278</i>  | 0.138         | 0.257        | -0.072           | <b>0.348</b>  | -0.175        | 0.005        | 0.199        | 0.227        | <b>-0.599</b> | -0.119          | <b>0.450</b> | <i>0.419</i> | 0.217  | <b>0.429</b> | 1     |    |
| TN               | <b>0.493</b>     | <b>0.400</b> | <b>0.519</b> | 0.186        | 0.111         | 0.461        | 0.146         | <b>-0.419</b>    | <b>-0.447</b> | <i>0.319</i>  | -0.230        | -0.078       | <b>-0.363</b>    | -0.054        | <b>-0.377</b> | 0.071        | 0.162        | 0.213        | <i>-0.259</i> | 0.041           | 0.165        | -0.225       | -0.008 | 0.104        | 0.115 | 1  |
